# Supplementary material for: Stable Sulfonic MCM-41 Catalyst for Furfural Production from Renewable Resources in a Biphasic System
Source: MDPI journal article supplement (doi:10.3390/catal13061024), 2023-06-20
Supplement: s1 [file s1]

## Supplementary Materials:

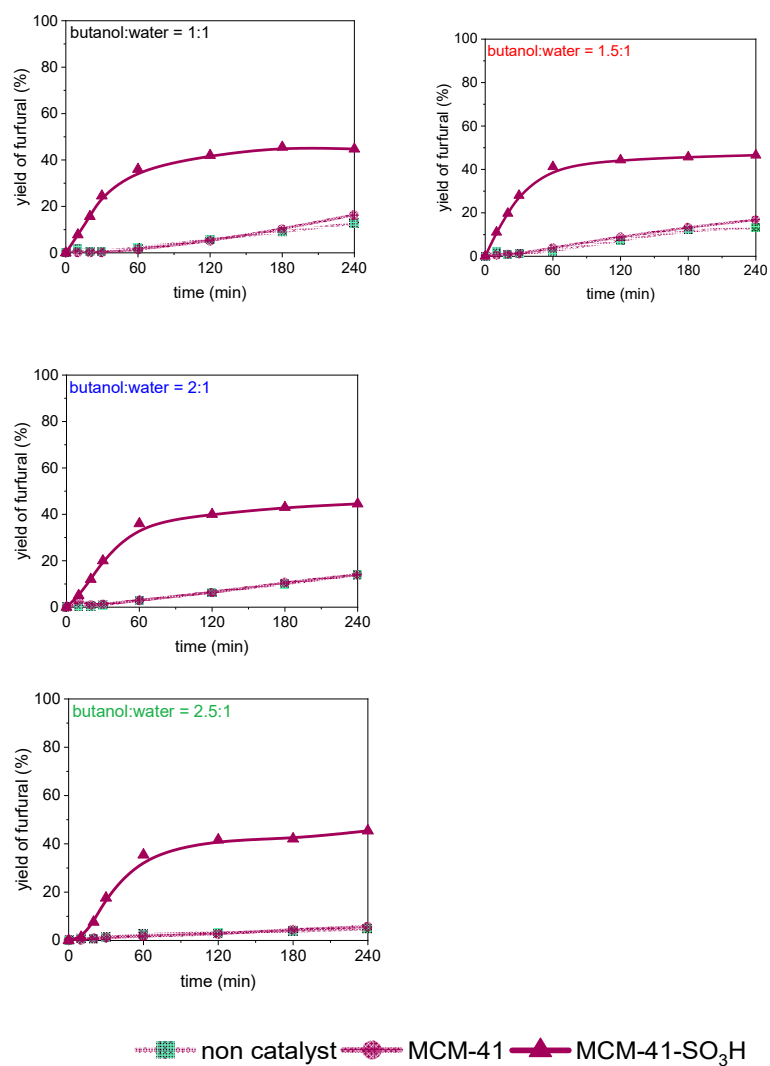

**Figure S1.** Yield of furfural upon time at different butanol:water ratio for the non-catalytic and MCM-41 and MCM-41-SO<sub>3</sub>H catalytic xylose conversion.

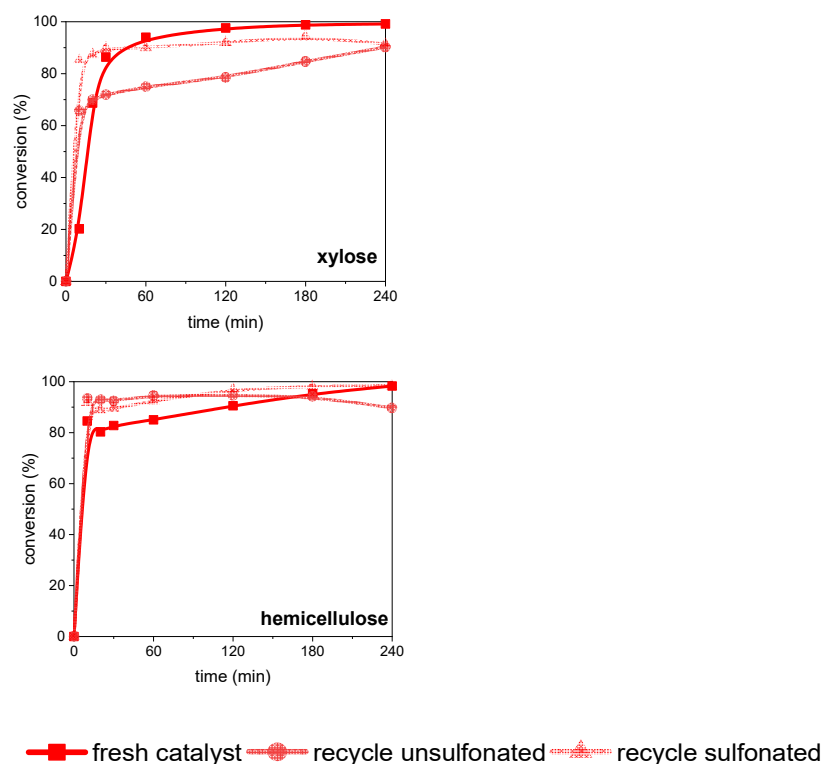

**Figure S2.** Xylose and hemicellulose conversion for fresh and recycles MCM-41-SO<sub>3</sub>H catalyst at a butanol:water ratio= 1.5:1.

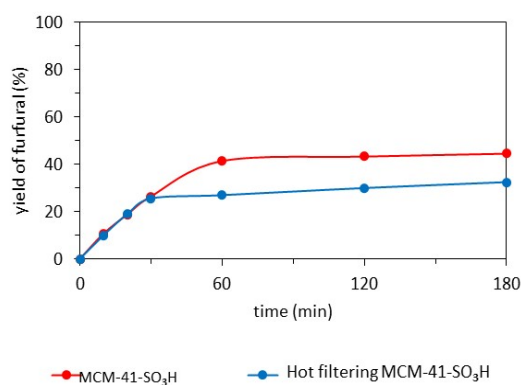

**Figure S3.** Furfural yield in MCM-41-SO<sub>3</sub>H catalyzed reaction (red) and compared to furfural yield during hot filtration experiment. The reaction was stopped after 30 min, filtered while hot and continued without the presence of the catalyst (blue).

**Table S1.** Xylose and xylan conversion to furfural in different catalysis conditions.

| Substrate | Solvent/catalyst                                                        | T (°C) | time (hours) | Yield (%)    | Ref. |
|-----------|-------------------------------------------------------------------------|--------|--------------|--------------|------|
| Xylose    | EMIM/H <sub>2</sub> SO <sub>4</sub> in water/toluene                    | 100    | 4/6          | <b>82/84</b> | [39] |
| Xylose    | H <sub>2</sub> SO <sub>4</sub> in water/toluene atm. pressure (boiling) | 105    | 5            | <b>83</b>    | [40] |
| Xylose    | DMSO/water                                                              | 110    | 4            | <b>1</b>     | [15] |
| Xylose    | [EMIM][H <sub>2</sub> SO <sub>4</sub> ]/T/120 8C                        | 120    | 4            | <b>58</b>    | [39] |

|                        |                                                          |     |      |              |      |
|------------------------|----------------------------------------------------------|-----|------|--------------|------|
| Xylan                  | H <sub>2</sub> SO <sub>4</sub> /GVL                      | 140 | 3    | <b>36</b>    | [41] |
| Xylose                 | DMSO/water                                               | 140 | 4    | <b>2</b>     | [15] |
| Xylose                 | MCM-41 DMSO/water                                        | 140 | 4/24 | <b>4/52</b>  | [15] |
| Xylose                 | MCM-41-SO <sub>3</sub> Hs water                          | 140 | 24   | <b>25</b>    | [15] |
| Xylose                 | MCM-41-SO <sub>3</sub> Hs DMSO/water                     | 140 | 4/24 | <b>49/77</b> | [15] |
| Xylose                 | MCM-41-SO <sub>3</sub> Hc water                          | 140 | 24   | <b>14</b>    | [15] |
| Xylose                 | MCM-41-SO <sub>3</sub> Hc DMSO/water                     | 140 | 4/24 | <b>65/82</b> | [15] |
| Xylose                 | SBA-15-SO <sub>3</sub> H (co-condensation) toluene/water | 160 | 4    | <b>68</b>    | [42] |
| Softwood-hemicellulose | Water HSUY, Si/Al                                        | 170 | 3    | <b>12</b>    | [43] |
| Xylose                 | MCM-41 (commercial) Butanol/NaCl + Water                 | 170 | 2    | <b>48</b>    | [36] |
| Xylose                 | MCM-41 Butanol/water 1:1                                 | 170 | 2    | <b>37</b>    | [36] |
| Xylose                 | MCM-41 Butanol/water 1.5:1                               | 170 | 2    | <b>40</b>    | [36] |
| Corn stover            | H <sub>2</sub> SO <sub>4</sub> /reactive distillation    | 170 | 1    | <b>86</b>    | [44] |
| Xylose                 | Water/toluene Silicoalumniphosphate                      | 170 | 6    | <b>65</b>    | [45] |
| Xylose                 | MCM-41-SO <sub>3</sub> H Butanol/water 1.5:1             | 170 | 2    | <b>46</b>    | *    |
| Xylan from wheat Straw | MCM-41-SO <sub>3</sub> H Butanol/water 1.5:1             | 170 | 2    | <b>34</b>    | *    |
| Xylose                 | DMSO/water                                               | 180 | 4    | <b>15</b>    | [15] |
| Corncob                | Steam-stripping, acetic acid and FeCl <sub>3</sub>       | 180 | 0,5  | <b>68</b>    | [46] |
| Xylose                 | Biphasic org./SO <sub>3</sub> H- acid ionic-liquid       | 180 | 1    | <b>85</b>    | [34] |
| Rice husk              | Two-stage treatment with Sc-CO <sub>2</sub>              | 180 | 3    | <b>50</b>    | [47] |
| Corncob                | Water/ZrO <sub>2</sub> -TiO <sub>2</sub> doping          | 170 | 2    | <b>50</b>    | [48] |

\*Results in this work.
